# Supplementary material for: An Evaluation of the Effectiveness of the Modalities Used to Deliver Electronic Health Interventions for Chronic Pain: Systematic Review With Network Meta-Analysis
Source: PubMed Central journal article supplement (PMC6668295; doi:10.2196/11086), 2019-07-17
Supplement: jmir_v21i7e11086_app3.pdf [file jmir_v21i7e11086_app3.pdf]

### Appendix 3

#### Network meta-analysis of eHealth modalities used to deliver interventions for the reduction of pain severity in a chronic pain population.

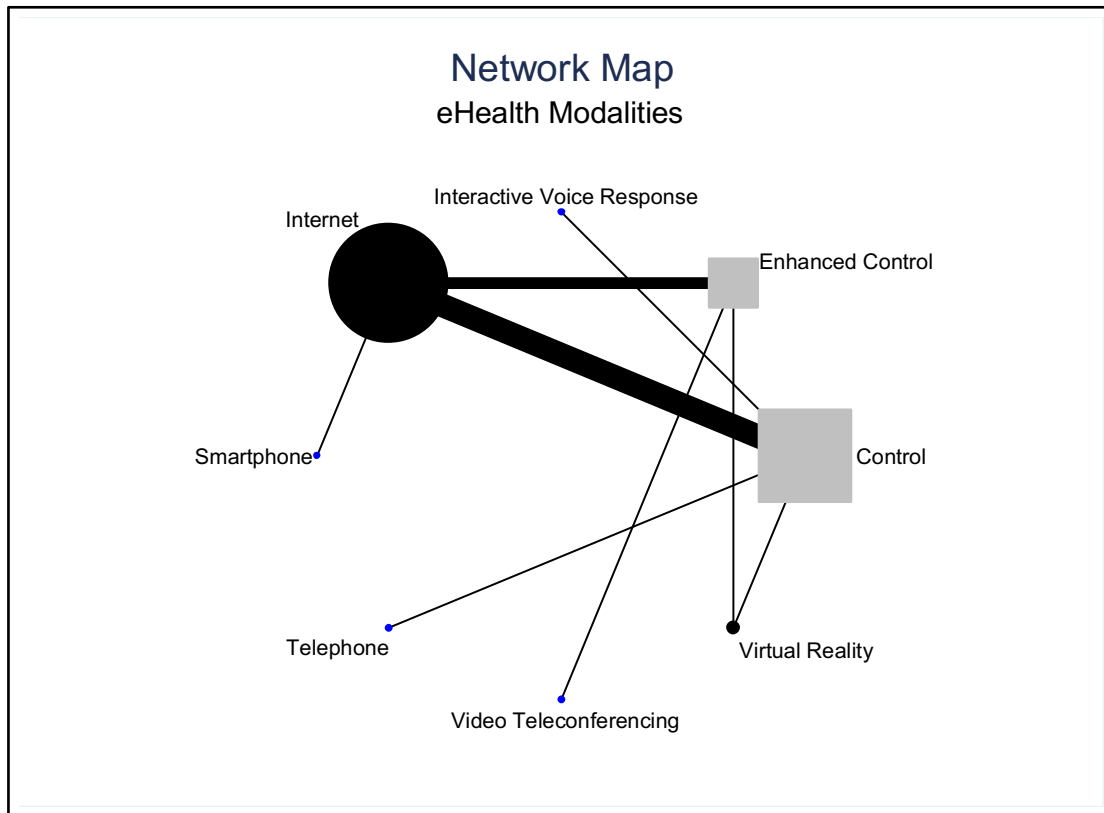

Pairwise comparisons between eHealth modalities delivering interventions for a reduction in pain severity

| Modality | A                           | B                           | C                           | D                          | E                           | F                             | G |
|----------|-----------------------------|-----------------------------|-----------------------------|----------------------------|-----------------------------|-------------------------------|---|
| <b>B</b> | -0.07<br>[-.67, .65]        |                             |                             |                            |                             |                               |   |
| <b>C</b> | -.26<br>[-1.04, .51]        | -.26<br>[-1.24, .73]        |                             |                            |                             |                               |   |
| <b>D</b> | .15<br>[-.67, .96]          | .16<br>[-.88, 1.2]          | .41<br>[-.71, 1.53]         |                            |                             |                               |   |
| <b>E</b> | -.06<br>[-.97, .85]         | -.05<br>[-1.15, 1.05]       | .2<br>[-.95, 1.36]          | -.21<br>[-1.43, 1.02]      |                             |                               |   |
| <b>F</b> | <b>2.22</b><br>[1.35, 3.08] | <b>2.22</b><br>[1.18, 3.27] | <b>2.48</b><br>[1.33, 3.63] | <b>2.07</b><br>[.88, 3.26] | <b>2.28</b><br>[1.02, 3.54] |                               |   |
| <b>G</b> | <b>.309</b><br>[.02, .6]    | 0.32<br>[-.33, .98]         | .57<br>[-.25, 1.4]          | .16<br>[-.7, 1.03]         | 0.37<br>[-.58, 1.33]        | <b>-1.91</b><br>[-2.72, -1.1] |   |

---

|          |                           |                    |                      |                   |                     |                               |                     |
|----------|---------------------------|--------------------|----------------------|-------------------|---------------------|-------------------------------|---------------------|
| <b>H</b> | <b>.2</b><br>[-.003, .41] | .21<br>[-.44, .87] | .047<br>[-.27, 1.21] | .05<br>[-.79, .9] | .27<br>[-.62, 1.15] | <b>-2.01</b><br>[-2.9, -1.13] | -.11<br>[-.46, .25] |
|----------|---------------------------|--------------------|----------------------|-------------------|---------------------|-------------------------------|---------------------|

---

Data displayed as SMD [Credible Interval]

Bolded entries are statistically significant

A=Internet, B=Virtual reality, C=Telephone, D=Mobile applications, E=Interactive voice response, F=Video teleconferencing, G=Enhanced control, H=Control

---
