# Supplementary material for: An Evaluation of the Effectiveness of the Modalities Used to Deliver Electronic Health Interventions for Chronic Pain: Systematic Review With Network Meta-Analysis
Source: PubMed Central journal article supplement (PMC6668295; doi:10.2196/11086), 2019-07-17

#### Appendix 4: Risk of bias across studies

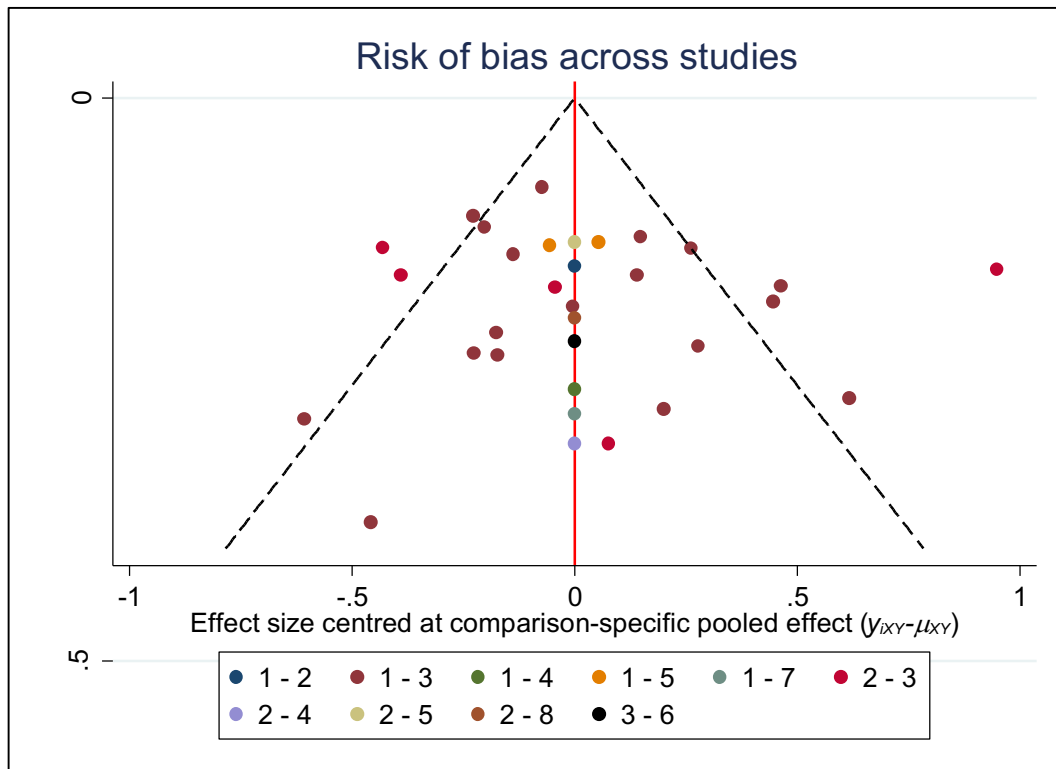

Supplement: jmir_v21i7e11086_app4.pdf [file jmir_v21i7e11086_app4.pdf]
